# Supplementary material
Source: PubMed Central journal article supplement (PMC3749301)
Supplement: NIHMS427716-supplement-1.pdf [file NIHMS427716-supplement-1.pdf]

Supplementary Table 1: Primers used in this study

| <b>Primer</b>            | <b>Sequence (5'-3')</b>                                                  |
|--------------------------|--------------------------------------------------------------------------|
| vecMSH2 5'               | ATCGAATTCCTGCAGCCCGGGGATCCACCTCAACAGCTACACATTC                           |
| MSH2luc 3'               | GGCGTCTCCATGGTACCCTTGTCATACTTTTAATCTGAGGATTTTGATGTTAGG                   |
| MSH2luc 5'               | CCTAACATCAAAATCCTCAGATTAAGATGACAAGGGTACCATGGAAGACGCC                     |
| vecLuc 3'                | GTGGCGGCCGCTCTAGAAGTAGTGGATCCTTACAATTTGGACTTTCCGCC                       |
| vecADH 5'                | ATCGAATTCCTGCAGCCCGGGGATCCGTATACTAGAAGAATGAGCCAAGACTTGCG                 |
| ADHluc 5'                | GCTATACCAAGCATACAATCAACTATCTCATATAACAATGACAAGGGTACCATGGAAGACGCC          |
| ADHluc 3'                | GGCGTCTCCATGGTACCCTTGTCATTGTATATGAGATAGTTGATTGTATGCTTGGTATAGC            |
| vecLuc 5'                | ATCGAATTCCTGCAGCCCGGGGATCCATGACAAGGGTACCATGGAAGACGCC                     |
| MSH2-5'REV               | TTAGCTCTGGCCTAGTGGAGG                                                    |
| ΔMCB                     | CATATATGAAAAATAGAAAGAAAGACCACTTGTCATTTTTTTTTTTAGTCGTGTATAATATACTGAAAA    |
| MSH2AflII                | GCTGACCTAACATCAAAATCCTCAGCTTAAGAGTATGTCCTCCACTAGGCC                      |
| MSH2-UP-ATG              | GGCTCTTTAATTGTTGACTCTAC                                                  |
| MSH2-UP-TAA              | CTGCTGACCGGACATCAAAATCTTCAG                                              |
| DEL3 5'                  | ATCGAATTCCTGCAGCCCGGGGATCCAAAACGCGAAAACCTTGTCAT                          |
| DEL4 5'                  | ATCGAATTCCTGCAGCCCGGGGATCCATAATATACTGAAAATAAAAAAGAGGC                    |
| vecMSH2Afl 5'            | GGGCGAATTGGGTACCGGGCCCCCTCGAGGTCGACGGACCTCAACAGCTACACATTC                |
| MSH2P <sub>MSH2</sub> 3' | GGCCTAGTGGAGGACATACTCTTAAGCTGAGGATTTTGATGTTAGGTCAGC                      |
| swi6 5'                  | CGCTGTAGCGACAACCCTTGACGCG                                                |
| swi6 3'                  | GGACGCCCGCGCAAACCATGGACG                                                 |
| mbp1 5'                  | GAGGCAATACTACGCTGTGAGACG                                                 |
| mbp1 3'                  | GGACGAAATCTACATCAACGGTGG                                                 |
| swi4 5'                  | GCCATCCTTTAGCATTTGGTTTAGC                                                |
| swi4 3'                  | CGACCTCATCTCATCGCGTTTTCC                                                 |
| kan 5'                   | TATGGAAGTGCCTCGGTGAG                                                     |
| kan 3'                   | TCGATAGATTGTGCGACCTG                                                     |
| MSH2TAG5                 | ACCAGAAAAGGAAAACGATAATTACCTGAAATATATAAAAGCCTTGTTGTTACGGATCCCCGGGTTAATTAA |
| MSH2TAG3                 | TTTGTATCTATATATTATCTATCGATTCTCACTTAAGATGTCGTTGTAATATCATCGATGAATTCGAGCTCG |
| 5341(-)                  | TTCTTTCCGAATCCATGC                                                       |
| 5200(+)                  | TACATTAACGTACACACC                                                       |
| 6260(-)                  | CTTTCTGGTTCATTTGC                                                        |
| MSH2-12 (+)              | TTGAAGGCTTTACTGAAA                                                       |
| vecMSH2utr3'             | GCGGTGGCGGCCGCTCTAGAAGTAGTGGATCCCTGTACCTTGCTACAAAGATTGTA                 |
| vecSPO                   | GGGCCCCCTCGAGGTCGACGGTATCGATGAGAGGCCCTGGGAGAAAAC                         |
| MSH2up                   | TCACTTGATGGAGTGCGGAACCTTGCTTTGGC                                         |
| MSH2dwn                  | ATGTCCTCCACTAGGCCAGAGCTAAAATTCTC                                         |
| vecMSH2                  | GTGGATCCCCGGGCTGCAGGAATTCGATATCATATCGTCTTGCAATTCAG                       |
| PRSF1up                  | GCCAAAGACAAGTTCGCACTCCATCAAGTGAATTGTTTTCCGGTCTAACTACACGC                 |
| PRSF1dwn                 | GAGAATTTAGCTCTGGCCTAGTGGAGGACATAACTGCTTGTAGTTCTATCTCCTTG                 |
| PROM2up                  | GCCAAAGACAAGTTCGCACTCCATCAAGTGAATTATAATACTGGGAGTGGAGAGACTGA              |
| PROM2dwn                 | GAGAATTTAGCTCTGGCCTAGTGGAGGACATAACCGCAGGAAAAGAGATGAATTGTCCAAT            |
